# Supplementary material for: A sensitive phosphorescence method based on MPA-capped Mn-doped ZnS quantum dots for the detection of diprophyllin
Source: Royal Society of Chemistry journal article supplement (doi:10.1039/c5nj03130c), 2016-01-01
Supplement: c5nj03130c1.pdf [file c5nj03130c1.pdf]

**Title: A sensitive phosphorescent method based on MPA-capped Mn-doped ZnS quantum dots for detection of Diprophyllin**

Manuscript ID NJ-ART-11-2015-003130

**To: New Journal of Chemistry**

**Ji Zheng, Xiao-xing Fang, Jin Qin, Zhi-feng Zhang, Yan-ming Miao, Gui-qin Yan**

**Supplementary information**

**Figure and Table captions**

**Fig.S1.** (a) TEM image of MPA-capped Mn-doped ZnS QDs; (b) XRD image of MPA-capped Mn-doped ZnS QDs; (c) The excitation (curve a) and RTP emission (curve b) spectra of Mn-doped ZnS QDs ( $40 \text{ mg L}^{-1}$ ) in PBS buffer (20 mM, pH 7.4).

**Fig.S2.** (a) Effect of pH on the quenched RTP of Mn-doped ZnS QDs by DPP; (b) Effect of time on the quenched RTP of Mn-doped ZnS QDs by DPP; (c) Effect of NaCl concentration on the RTP emission of the Mn-doped ZnS QDs. The concentration of Mn-doped ZnS QDs is  $40 \text{ mg L}^{-1}$ .

**Table S1** Effect of co-existing substance on the RTP intensity of 117 nM DPP.

## Supplementary Materials:

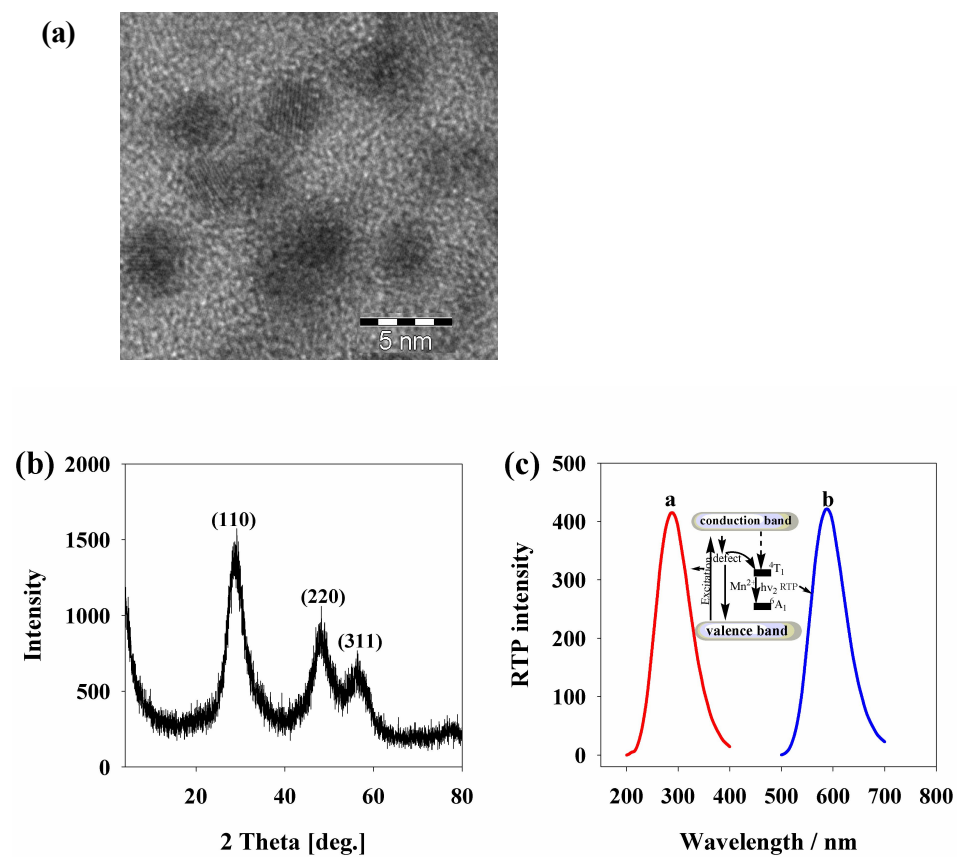

**Fig.S1.**(a) TEM image of MPA-capped Mn-doped ZnS QDs; (b) XRD image of MPA-capped Mn-doped ZnS QDs; (c) The excitation (curve a) and RTP emission (curve b) spectra of Mn-doped ZnS QDs ( $40 \text{ mg L}^{-1}$ ) in PBS buffer (20 mM, pH 7.4).

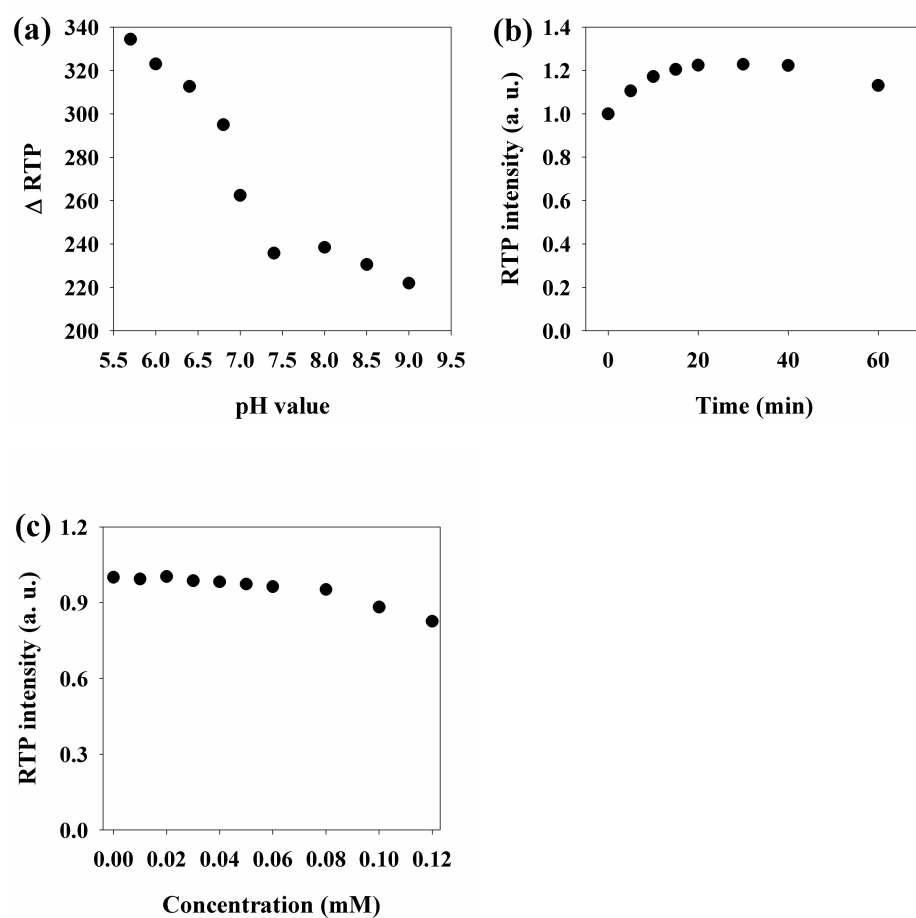

**Fig.S2.** (a) Effect of pH on the RTP emission of Mn-doped ZnS QDs by DPP; (b) Effect of time on the RTP emission of Mn-doped ZnS QDs by DPP; (c) Effect of NaCl concentration on the RTP emission of the Mn-doped ZnS QDs. The concentration of Mn-doped ZnS QDs and DPP is  $40 \text{ mg L}^{-1}$  and  $196.6 \text{ nM}$ , respectively.

| Anion                         | [Anion]/[Sulfide] | Change of phosphorescence intensity (%) |
|-------------------------------|-------------------|-----------------------------------------|
| Na <sup>+</sup>               | 50                | +1.2                                    |
| K <sup>+</sup>                | 100               | -3.1                                    |
| Ca <sup>2+</sup>              | 30                | -2.9                                    |
| Mg <sup>2+</sup>              | 30                | +1.5                                    |
| SO <sub>4</sub> <sup>2-</sup> | 50                | +2.6                                    |
| Cl <sup>-</sup>               | 100               | +1.5                                    |
| Br <sup>-</sup>               | 100               | -1.7                                    |
| NO <sub>3</sub> <sup>-</sup>  | 100               | +2.9                                    |
| L-Gly                         | 17                | +3.4                                    |
| L-Cys                         | 30                | -1.3                                    |
| Glucose                       | 50                | +2.3                                    |

Table S1. Effect of co-existing substance on the RTP intensity of 117 nM DPP.
